# Supplementary material
Source: HighWire-hosted journal article supplement (https://jnm.snmjournals.org/highwire/filestream/95283/field_highwire_adjunct_files/0/190975_Supplemental_Data.pdf)
Supplement: 190975_Supplemental_Data.pdf [file 190975_Supplemental_Data.pdf]

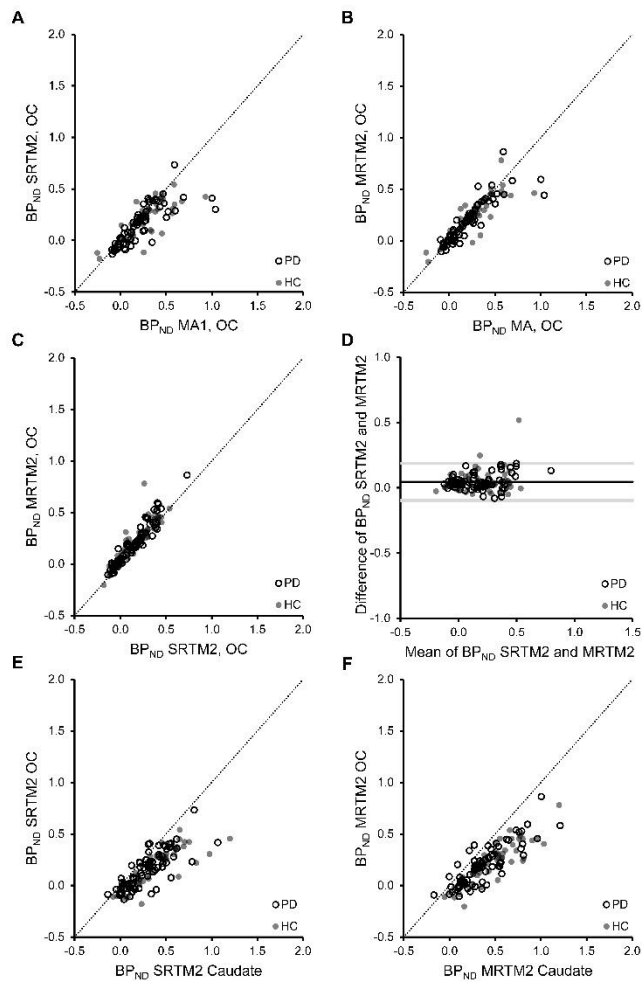

SUPPLEMENTAL FIGURE 1: A+B: BP<sub>ND</sub> estimates were comparable between models requiring blood samples and reference tissue models (A: SRTM2 and B: MRTM2 versus MA1). C-D: BP<sub>ND</sub> estimates of SRTM2 and MRTM2 were in agreement; MRTM2 estimates tended to be higher. E+F: BP<sub>ND</sub> estimates with the occipital cortex as reference were lower than estimates with the caudate as reference using SRTM2 and MRTM2 (Figure A-C and E-F; dotted line represents line of identity, Figure D, black line mean difference and grey lines  $\pm 1.96$ SD).

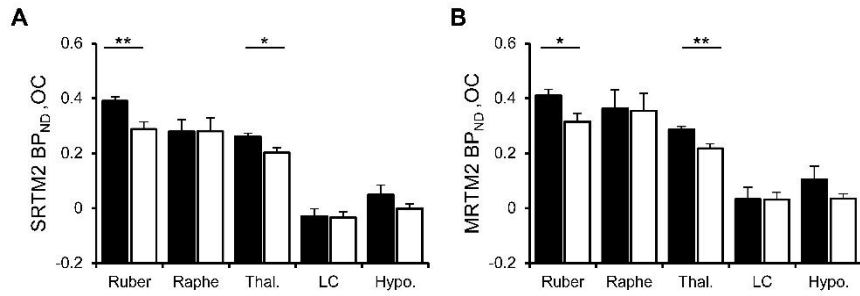

SUPPLEMENTAL FIGURE 2: PD patients showed decreased  $^{11}\text{C}$ -MeNER  $\text{BP}_{\text{ND}}$  compared to healthy controls in various regions with high levels of noradrenaline transporter (group effect:  $p=0.015$  with SRTM2 (A) and  $p=0.006$  with MRTM2 (B)). Region-wise significant differences are indicated as following:  $p<0.05$ , \*, and  $p<0.01$ , \*\* (after Bonferroni adjustment).

Abbreviations: Ruber: Nucleus Ruber, Raphe: Median Raphe Nucleus, Thal.: Thalamus, LC: Locus Coeruleus, Hypo.: Hypothalamus.
